# Supplementary material for: Defining Minimum Essential Factors to Derive Highly Pure Human Endothelial Cells from iPS/ES Cells in an Animal Substance-Free System
Source: PubMed Central journal article supplement (PMC4394195; doi:10.1038/srep09718), 2015-04-13
Supplement: srep09718-s1.pdf [file srep09718-s1.pdf]

## Defining Minimum Essential Factors to Derive Highly Pure Human Endothelial Cells from iPS/ES

### Cells in an Animal Substance-Free System

Yu-Ting Wu, I-Shing Yu, Kuen-Jer Tsai, Chien-Yu Shih, Shiaw-Min Hwang, Ih-Jen Su, Po-Min Chiang

|        | Forward Primer         | Reverse Primer         |
|--------|------------------------|------------------------|
| NANOG  | TCGTATTTGCTGCATCGTAA   | CTCATTGAAACACTCGGTGA   |
| CDH1   | GATTTTTCGGCAGTTCAAGC   | TTCCACCCCCAAAGAAAAT    |
| CLDN3  | GACCGCCAATACTTGACC     | AAATATCAAGTGCCCCCTCC   |
| CDH2   | GAAAGGAAAGAAAGGGGTGG   | TGTCAGAAGTCTCTCCAGTT   |
| VIM    | AAGAAACAGCTTTCAAGTGC   | TGTAGGAGTGTGCGTTGTTA   |
| ITGB1  | TACGCGAGTCTTACTTTGAG   | ACTAGTGTGAAACAAGATGGG  |
| FN1    | GCTAGTTTACCGTTCAGAAGTA | TTCAATGAAGGAAAGGTGGAG  |
| ZEB1   | TATTCCTTCCCCACTAGGAAC  | ATCTGTTGTCCCAACTTATGC  |
| SNAI2  | GATGGGAATAAGTGCAAAGAG  | CACTTGGAAGGGGTATTGTAT  |
| TWIST1 | AAGGCATCACTATGGACTTTC  | TAACTGACTATGGTTTTGCAGG |
| PDGFRA | GCACATTAAGTGTGCACTT    | CACACCATTGTTTTGGGAAC   |
| T      | GATGCAGTGACTTTTTGTCG   | CTTCTTAACCTGAGACTGCC   |
| HAND1  | CTCAGGTGTTTGTTCATCCT   | CAAGAGCATAGACTGCTT     |
| KDR    | CCCATCCTCAAAGAAGTAGC   | AACACTTACATTGCCTGGTT   |
| GATA4  | GAAGTCTTTTGTCCAGGAGG   | TTAGCAGTCGTCTTCTTCC    |
| GATA2  | TCCCGAGCTTAGATTCTGTA   | GGTCACTACATCAGCACAAT   |
| PDGFRB | TACCCCAAGAAGGATGTGAG   | GGGCAGTGACAAAACCATA    |
| ETV2   | GAATTACGAGAAGCTGAGCC   | GAAGCGGTACGTGTACTTTC   |
| FLI1   | AGGGTAACACTAAGTACCTTCT | CTTTTTAAATGGCAGGGTGC   |
| ACTA2  | AACAGGAATACGATGAAGCC   | GGCATAATTCCACAGGACAT   |
| TAL1   | GTGATTTTCGATGGTACGTGA  | AGTACAACGTTGACGGAAAG   |
| CDH5   | ATCAGGAGTGACAGATCACA   | GAGTCTCAAAGCAAGGTCTC   |
| TEK    | TTTATCCCTCACCTGTAGCA   | AGATGTTAGCATCCTGGACT   |
| LMO2   | TTTCAATCACTGTCCTCCAC   | TCTCCATGCAGTTTTCTTG    |
| PECAM1 | GCCCTAGAAGCCAATTAGTC   | TACCTTTCAGAGACCTCCTC   |
| GAPDH  | ACAAGAGGAAGAGAGAGACC   | CCTCTTCAAGGGGTCTACAT   |

Supplemental Table 1. Primers used for RT-qPCR.
